# Supplementary material for: Nanocomposites by the use of simultaneous twin polymerization: tin alloys in a carbon/silica matrix
Source: Royal Society of Chemistry journal article supplement (doi:10.1039/c5ra18574b), 2015-12-22
Supplement: c5ra18574b1.pdf [file c5ra18574b1.pdf]

**Supporting online material**

**Nanocomposites by the use of Simultaneous Twin Polymerization:  
tin alloys in a carbon / silica matrix**

*Christian Leonhardt,<sup>[a]</sup> Andreas Seifert,<sup>[b]</sup> Szilard Csihony,<sup>[c]</sup> Heino Sommer,<sup>[c]</sup> Michael  
Mehring<sup>\*[a]</sup>*

*<sup>[a]</sup> Technische Universität Chemnitz, Fakultät für Naturwissenschaften, Institut für Chemie, Professur  
Koordinationschemie, Straße der Nationen 62, D-09107 Chemnitz, Germany*

*<sup>[b]</sup> Technische Universität Chemnitz, Fakultät für Naturwissenschaften, Institut für Chemie, Professur  
Polymerchemie, Straße der Nationen 62, D-09107 Chemnitz, Germany*

*<sup>[c]</sup> BASF SE, Carl-Bosch Straße 38, D-67056 Ludwigshafen, Germany*

*\* Corresponding author. Fax: +49 (0) 371 531 21219.*

*E-mail: michael.mehring@chemie.tu-chemnitz.de*

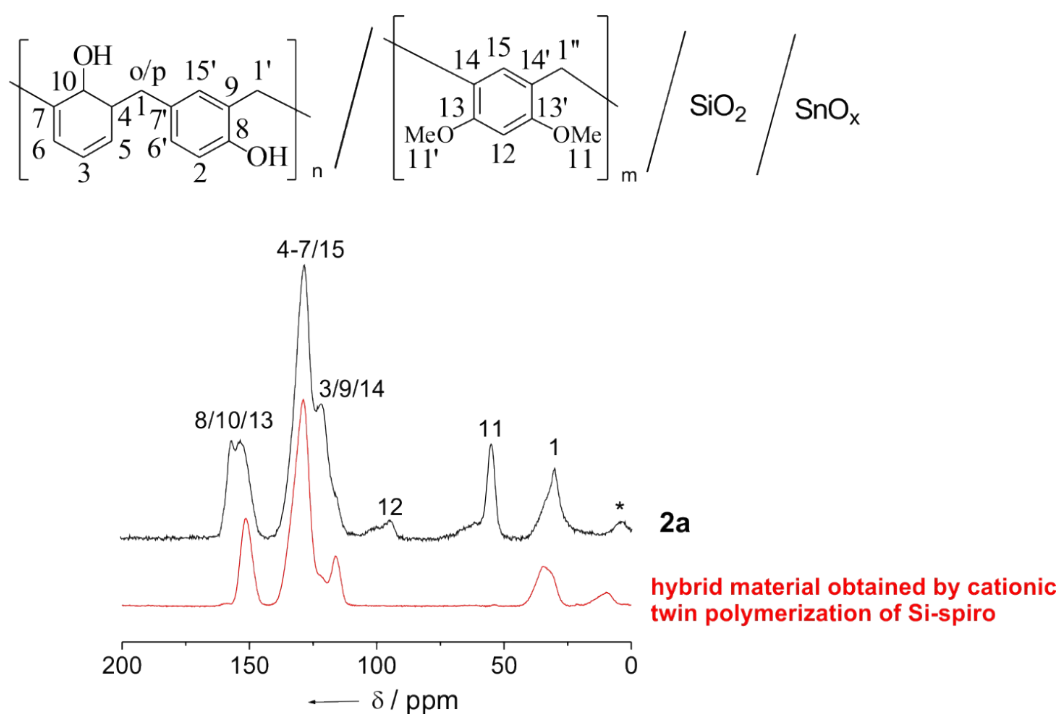

**Figure S1.** Comparison of the solid state  $^{13}\text{C}$   $\{^1\text{H}\}$  CP MAS NMR spectrum of hybrid material **2a** (phenolic resin/  $\text{SiO}_2$ /  $\text{SnO}_x$ ) with the solid state  $^{13}\text{C}$   $\{^1\text{H}\}$  CP MAS NMR spectrum of the hybrid material obtained by cationic twin polymerization of Si-Spiro (phenolic resin/  $\text{SiO}_2$ ).

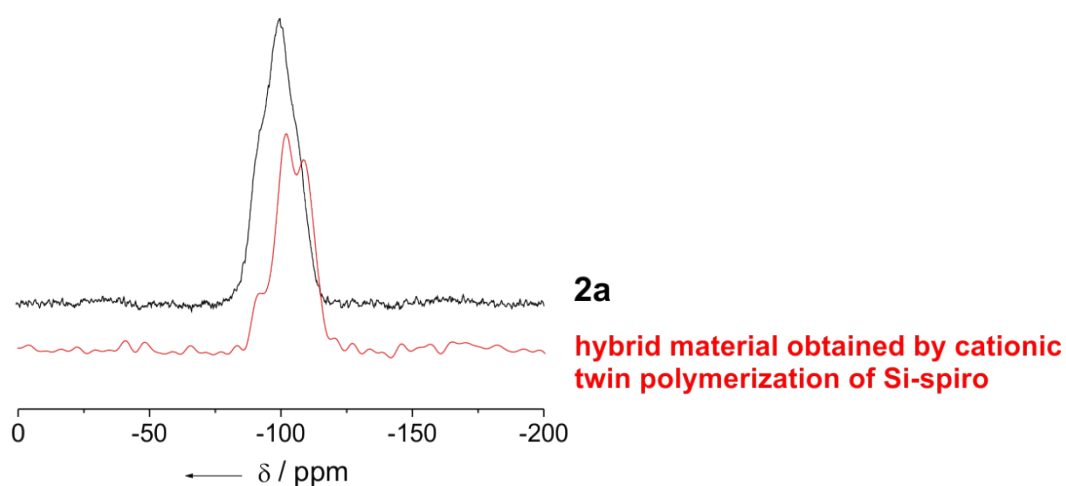

**Figure S2.** Comparison of the solid state  $^{29}\text{Si}$   $\{^1\text{H}\}$  CP MAS NMR spectrum of hybrid material **2a** (phenolic resin/  $\text{SiO}_2$ /  $\text{SnO}_x$ ) with the solid state  $^{29}\text{Si}$  MAS NMR (quantitative) spectrum of the hybrid material obtained by cationic twin polymerization of Si-spiro (phenolic resin/  $\text{SiO}_2$ ).

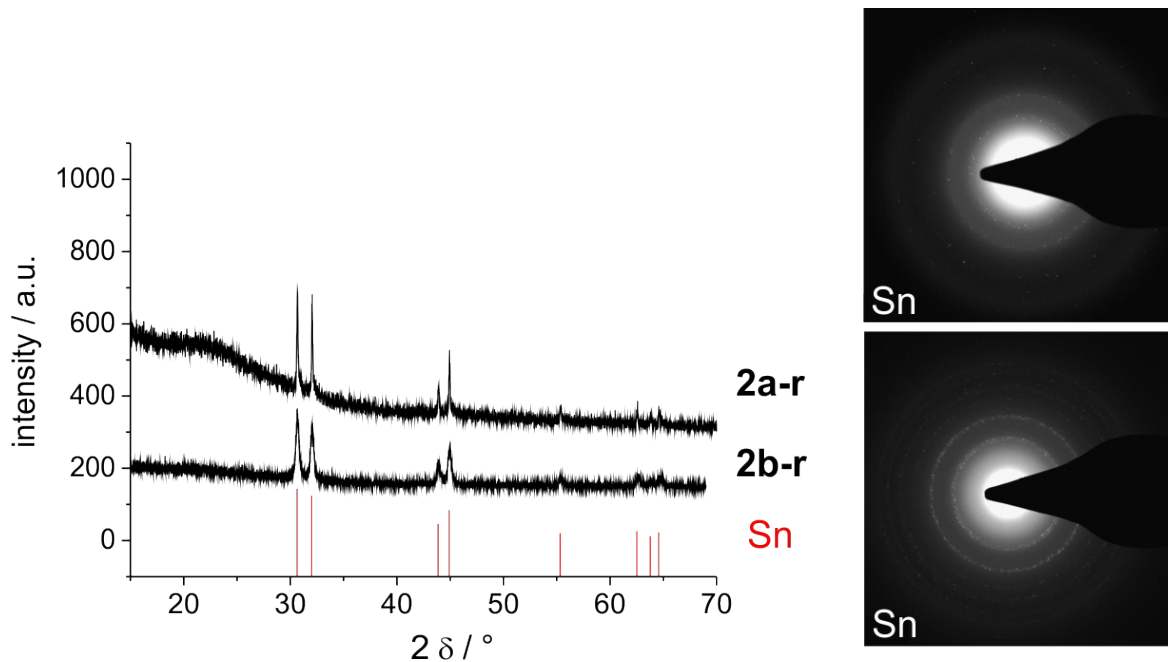

**Figure S3.** Left: powder X-ray diffraction (PXRD) pattern of the nanocomposites **2a-r** and **2b-r** (argon/ hydrogen (95/5 %); heating rate: 10 K/min, final temperature: 600 °C, time 2 h). (Sn: JCPDS 03-065-0296). Right: Selected area electron diffraction of **2a-r** (top) and **2b-r** (bottom).

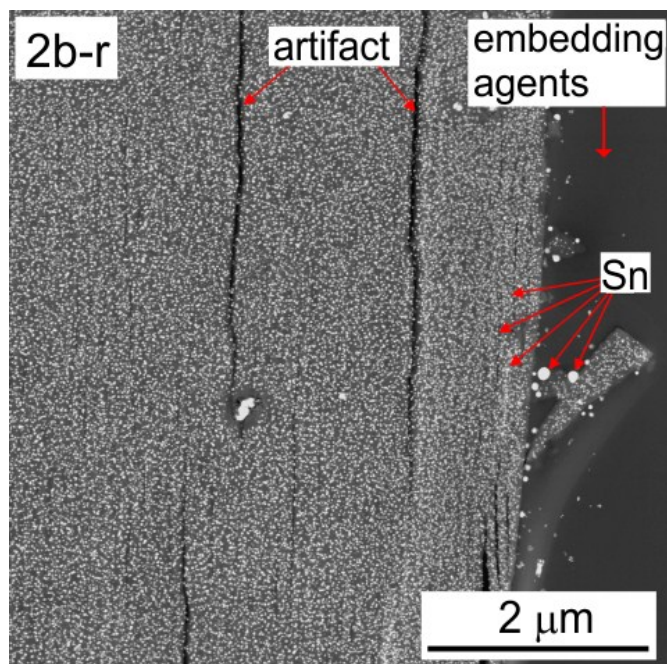

**Figure S4.** HAADF-STEM image of the nanocomposite Sn/C/SiO<sub>2</sub> **2b-r**.

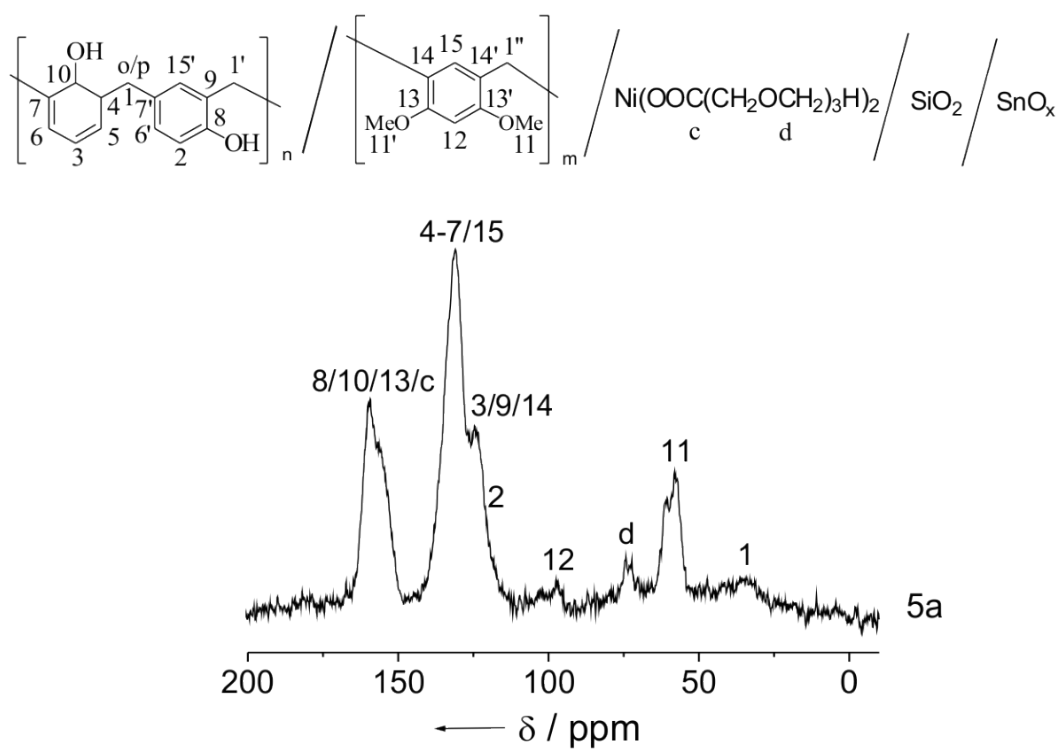

**Figure S5.** Solid state  $^{13}\text{C}$   $\{^1\text{H}\}$  CP MAS NMR spectrum of hybrid material **5a** (phenolic resin/ $\text{Ni}(\text{OOC}(\text{CH}_2\text{OCH}_2)_3\text{H})_2/\text{SiO}_2/\text{SnO}_x$ ).

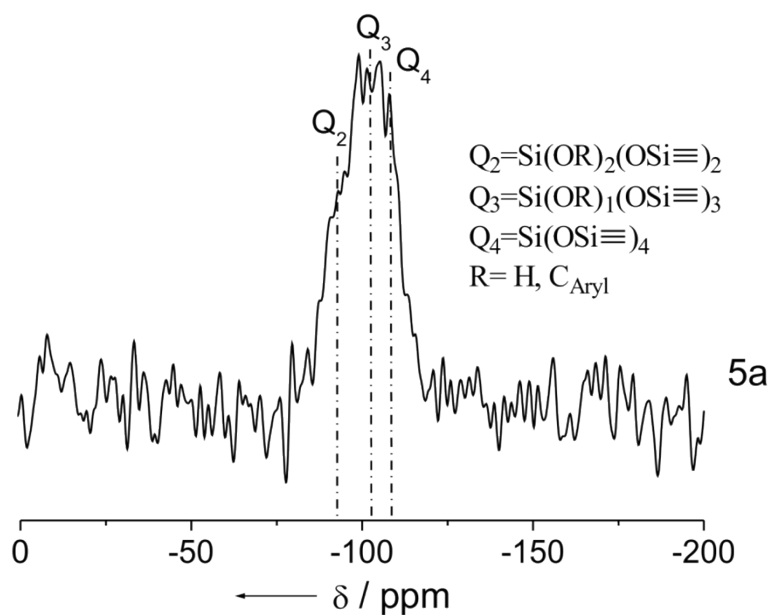

**Figure S6.** Solid state  $^{29}\text{Si}$   $\{^1\text{H}\}$  CP MAS NMR spectrum of hybrid material **5a**.

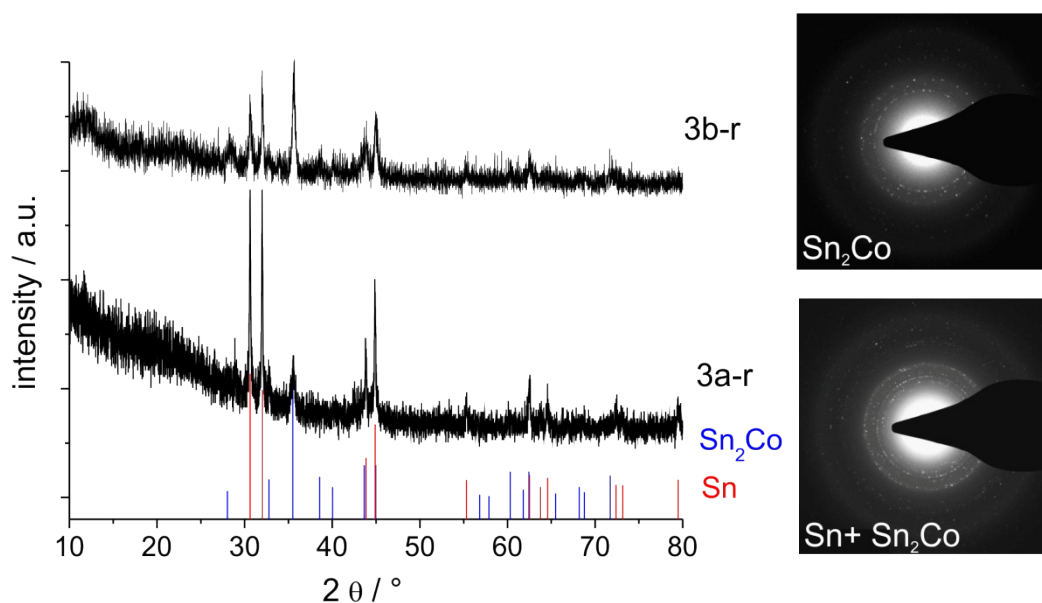

**Figure S7.** Left: powder X-ray diffraction (PXRD) pattern of the nanocomposites **3b-r** and **3a-r** (argon/ hydrogen (95/5 %); heating rate: 10 K/min, final temperature: 600 °C, time 2 h). (Sn: JCPDS 03-065-0296, Sn<sub>2</sub>Co: JCPDS 00-025-0256). Right: Selected area electron diffraction of **3b-r** (top) and **3a-r** (bottom).

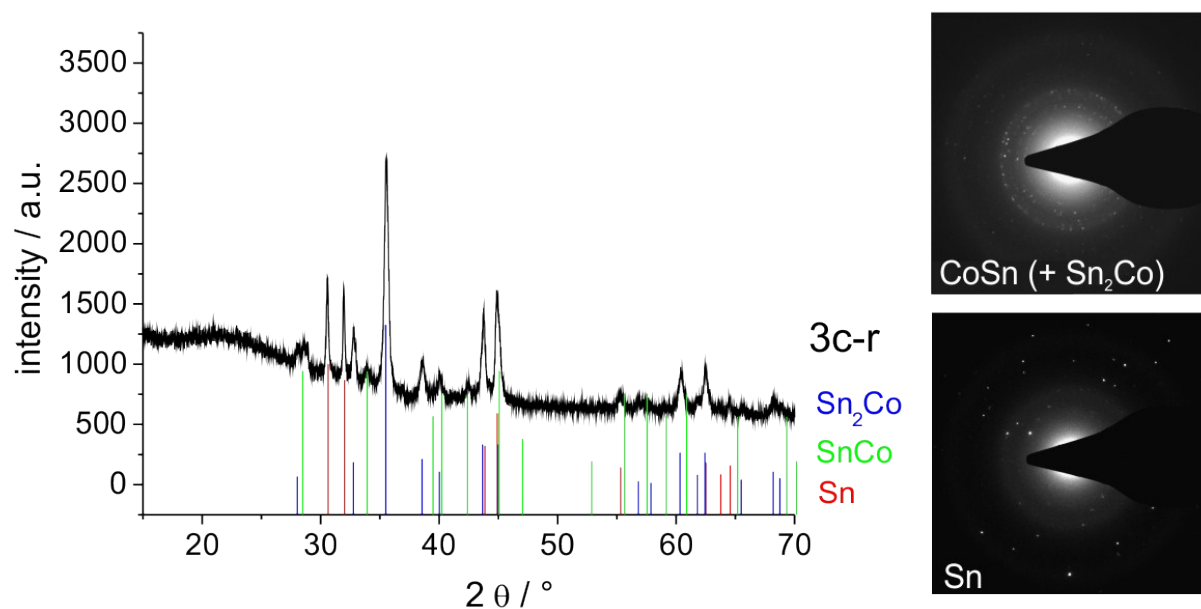

**Figure S8.** Left: Powder X-ray diffraction (PXRD) pattern of the nanocomposites **3c-r** (argon/ hydrogen (95/5 %); heating rate: 10 K/min, final temperature: 600 °C, time 2 h). (Sn: JCPDS 03-065-0296, Sn<sub>2</sub>Co: JCPDS 00-025-0256, SnCo: JCPDS 00-002-0559). Right: Selected area electron diffraction of **3c-r**.

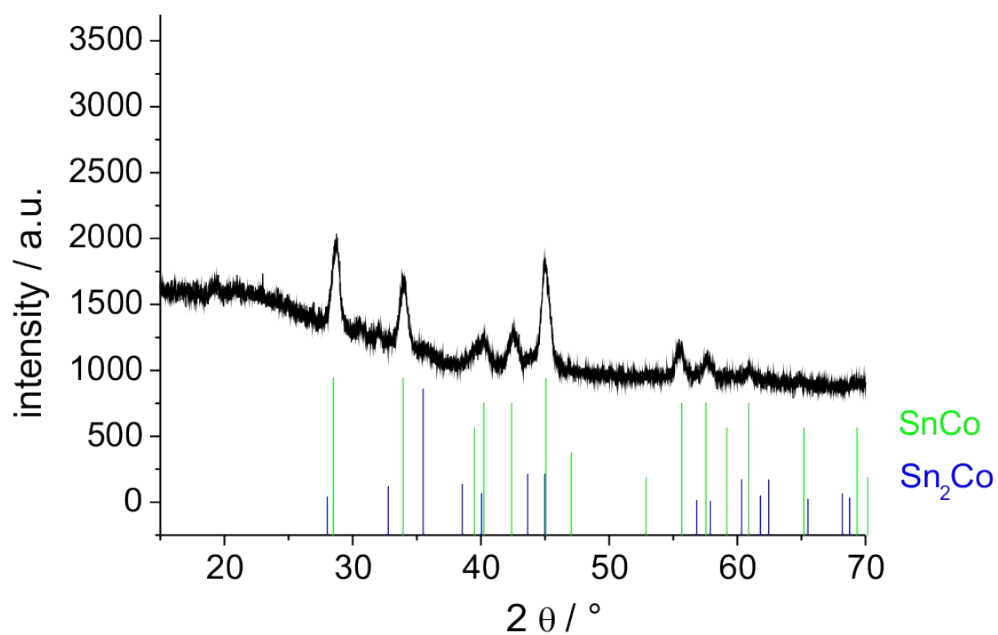

**Figure S9.** Powder X-ray diffraction (PXRD) pattern of the reduced (argon/ hydrogen (95/5 %)) hybrid material obtained from the twin polymerization of Si-spiro with tin(II)-2,4-dimethoxyphenylmethanolate and cobalt(II)-2-(2-(2-methoxyethoxy)ethoxy)acetate (Si/Sn/Co ratio: 3:1:0.5); heating rate: 10 K/min, final temperature: 800 °C, time 2 h). (Sn<sub>2</sub>Co: JCPDS 00-025-0256, SnCo: JCPDS 00-002-0559).

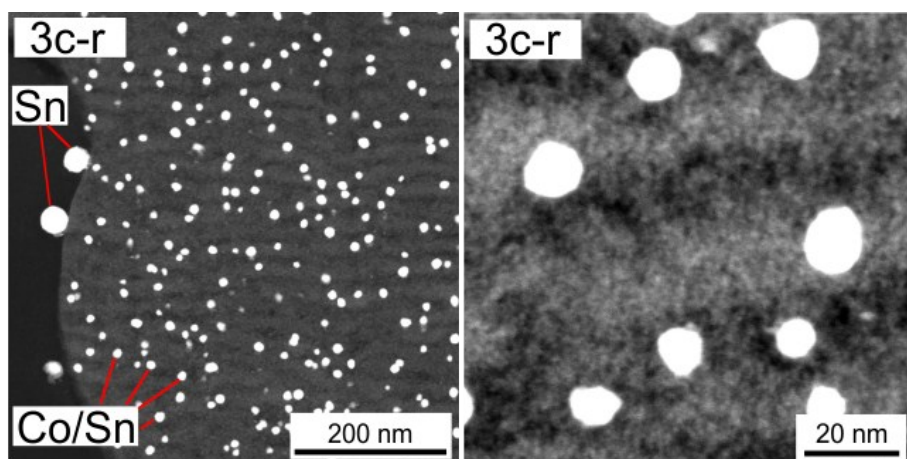

**Figure S10.** HAADF-STEM images of the nanocomposite Sn<sub>2</sub>Co/C/SiO<sub>2</sub> **3c-r**.

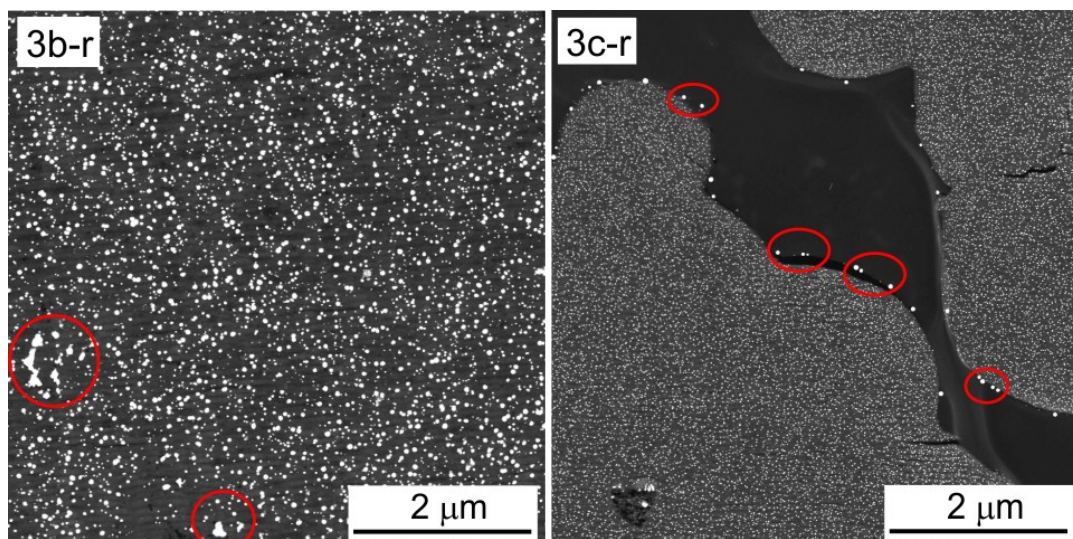

**Figure S11.** HAADF-STEM images of the nanocomposites  $\text{Sn}_2\text{Co}/\text{C}/\text{SiO}_2$  **3b-r** and **3c-r**.

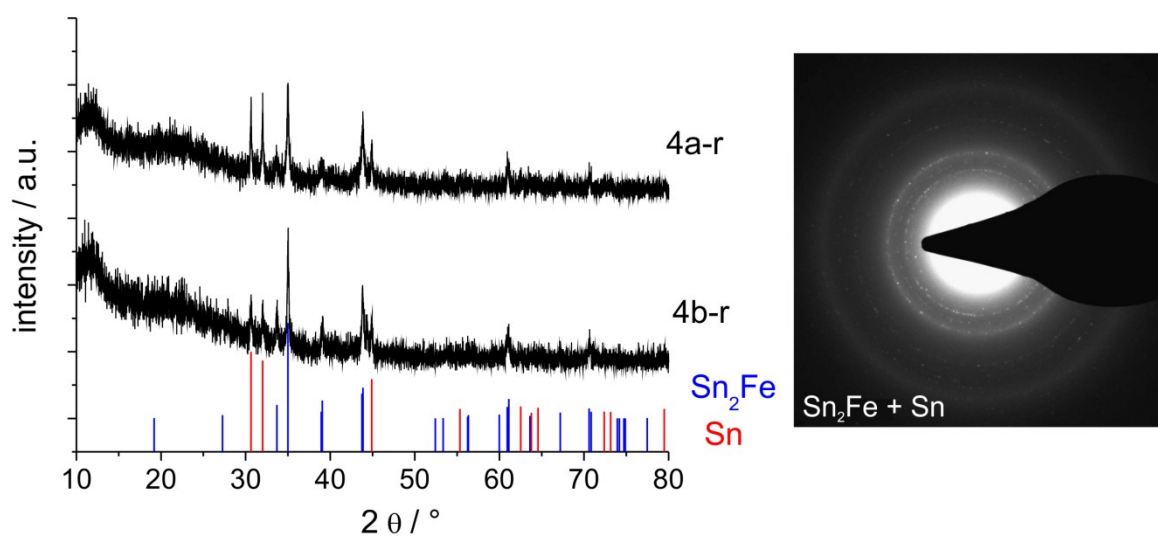

**Figure S12.** Left: powder X-ray diffraction (PXRD) pattern of nanocomposites **4a-r** and **4b-red** (argon/ hydrogen (95/5 %); heating rate: 10 K/min, final temperature: 600 °C, time 2 h). (Sn: JCPDS 03-065-0296,  $\text{Sn}_2\text{Fe}$ : JCPDS 03-065-0374) Right: Selected area electron diffraction of **4a-r**.

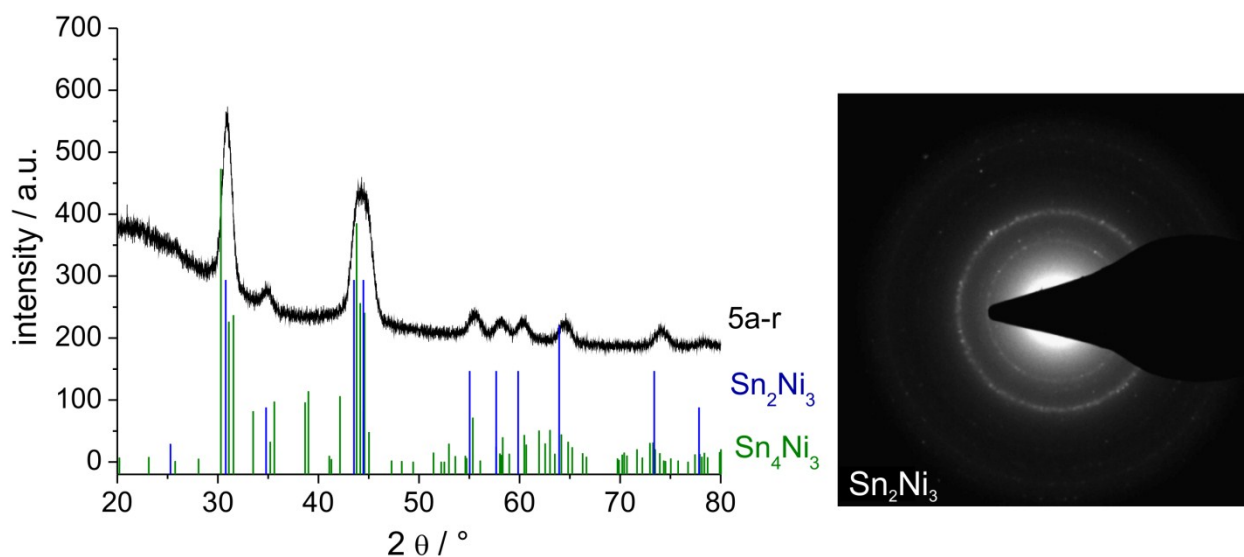

**Figure S13.** Left: powder X-ray diffraction (PXRD) pattern of nanocomposite **5a-r** (argon/ hydrogen (95/5 %); heating rate: 10 K/min, final temperature: 780 °C, time 3 h). ( $\text{Sn}_4\text{Ni}_3$ : JCPDS 03-065-2313,  $\text{Sn}_2\text{Ni}_3$ : JCPDS 00-006-0414). Right: Selected area electron diffraction of **5a-r**.

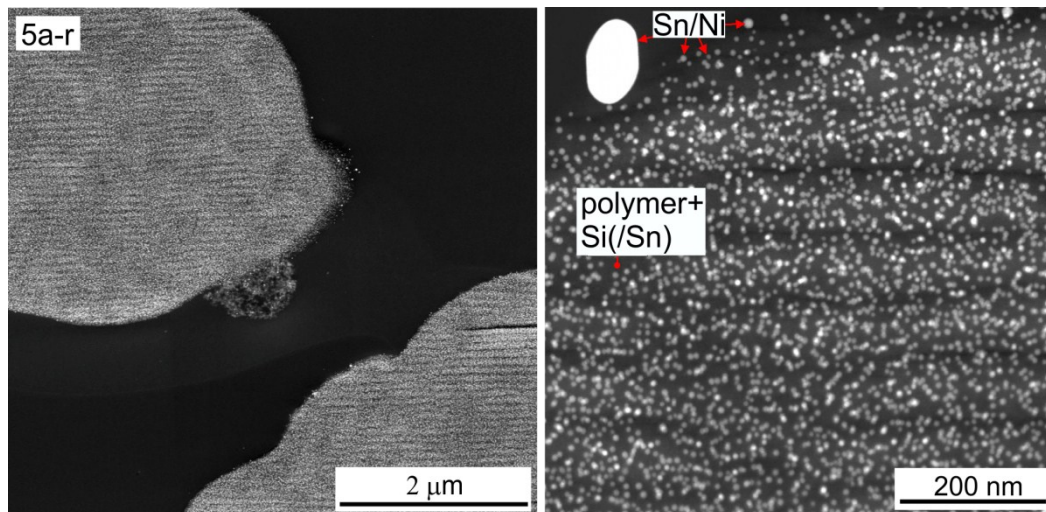

**Figure S14.** HAADF-STEM images of the nanocomposite  $\text{Ni}_3\text{Sn}_2/\text{C}/\text{SiO}_2$  **5a-r**.



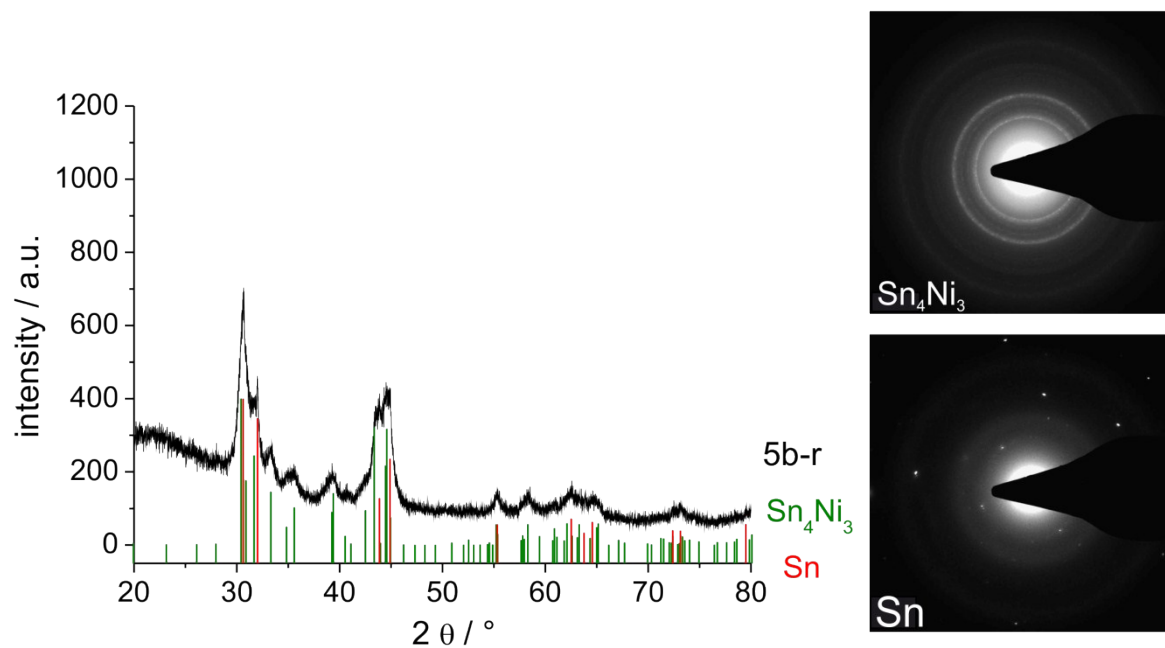

**Figure S15.** Left: powder X-ray diffraction (PXRD) pattern of nanocomposite **5b-r** (argon/ hydrogen (95/5 %); heating rate: 10 K/min, final temperature: 780 °C, time 3 h). (Sn<sub>4</sub>Ni<sub>3</sub>: JCPDS 03-065-2313; Sn: JCPDS 03-065-0296) Right: Selected area electron diffraction of **5b-r**.

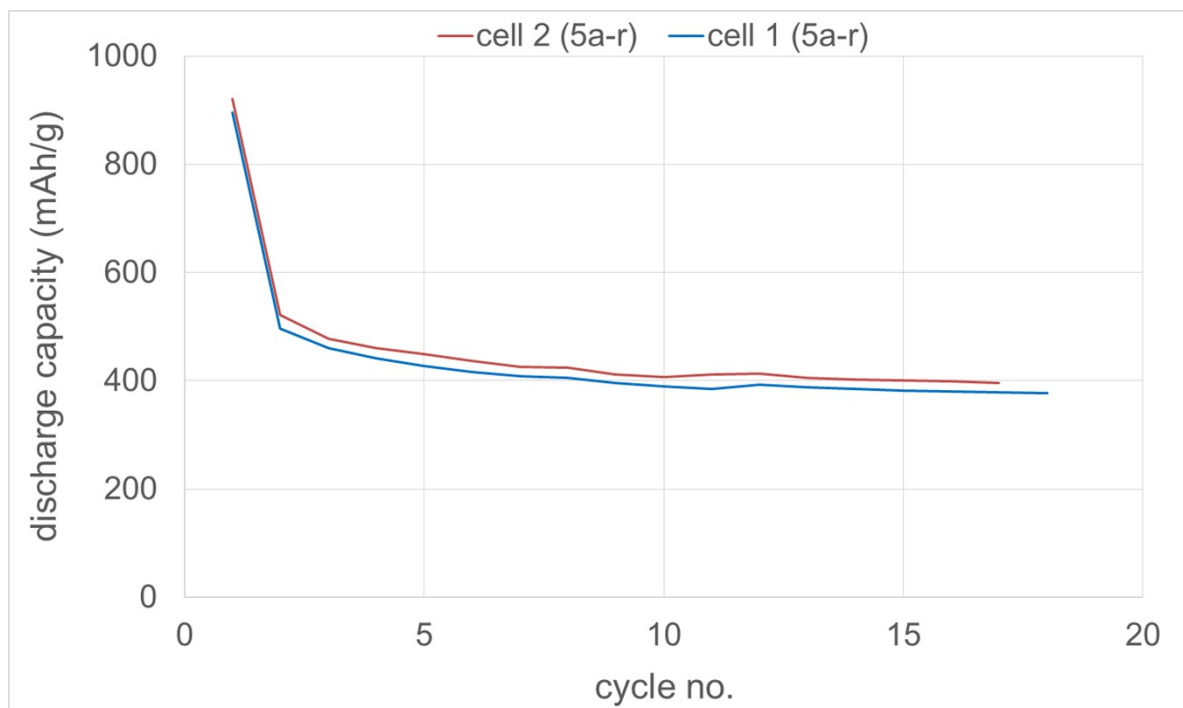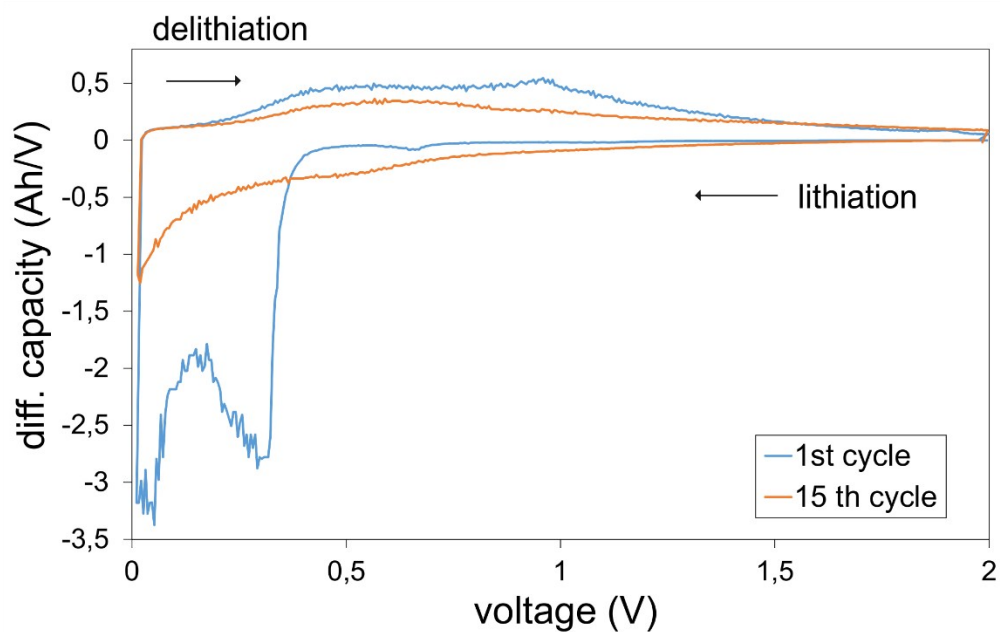

**Figure S16.** Top: Cycling performance of the nanocomposite **5a-r**. Bottom: The differential capacity of the electrode produced from the nanocomposite **5a-r** at a voltage of 0 to 2 V. The **5a-r** shows the expected curve profile for a tin-nickel-alloy/carbon composite during the lithiation and delithiation of the material.<sup>[1]</sup>

[1] a) J. Qin, X. Zhang, N. Zhao, C. Shi, E. Liu, J. Li, C. He, *RSC Adv.* **2014**, *4*, 49247-49256; b) D. Guan, J. Li, X. Gao, C. Yuan, *J. Alloy Compd.* **2014**, *617*, 464-471.

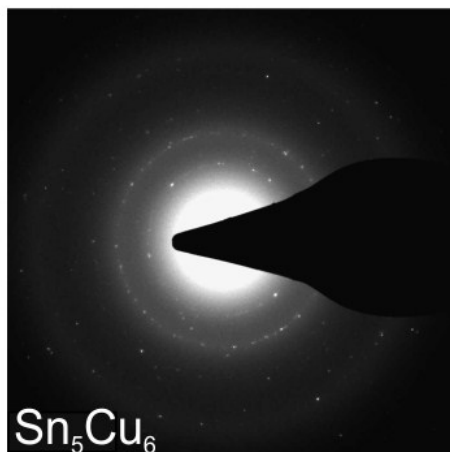

**Figure S17.** Selected area electron diffraction of the nanocomposite **6-r**.

*Synthesis of hybrid materials:*

Synthesis of hybrid materials (General method):

In a typical reaction 2,2'-spirobi[4*H*-1,3,2-benzodioxasiline] and tin(II)-2,4-dimethoxyphenylmethanolate (**1**) were suspended in toluene and heated to 90 °C. The colorless solution changed to a red color and the metal containing additive was added. The reaction mixture was then heated to 105 °C and after stirring for 12 hours the as obtained precipitate was filtered off, washed three times with acetone (10 ml) and dried in vacuo.

*Hybrid material 2a:* Polymerization of 2,2'-spirobi[4*H*-1,3,2-benzodioxasiline] (3.0 g, 11.02 mmol) and **1** (1.66 g, 3.67 mmol) in toluene (25 ml) gave 2.98 g (64 wt.%) of a pale violet powder.

*Hybrid material 2b:* Polymerization of 2,2'-spirobi[4*H*-1,3,2-benzodioxasiline] (0.94 g, 3.45 mmol) and **1** (1.56 g, 3.45 mmol) in toluene (20 ml) gave 1.38 g (55 wt.%) of a pale violet powder.

*Hybrid material 3a:* Polymerization of 2,2'-spirobi[4*H*-1,3,2-benzodioxasiline] (1.12 g, 4.11 mmol) and **1** (0.62 g, 1.37 mmol) in the presence of cobalt(II)-2-(2-(2-methoxyethoxy)ethoxy)acetate (0.06 g, 0.14 mmol) in toluene (20 ml) gave 1.21 g (67 wt.%) of a pale violet powder.

*Hybrid material 3b:* Polymerization of 2,2'-spirobi[4*H*-1,3,2-benzodioxasiline] (0.41 g, 1.51 mmol) and **1** (0.68 g, 1.51 mmol) in the presence of cobalt(II)-2-(2-(2-methoxyethoxy)ethoxy)acetate (0.14 g, 0.33 mmol) in toluene (20 ml) gave 0.63 g (51 wt.%) of a pale violet powder.

*Hybrid material 3c:* Polymerization of 2,2'-spirobi[4*H*-1,3,2-benzodioxasiline] (1.19 g, 4.37 mmol) and **1** (0.66 g, 1.46 mmol) in the presence of cobalt(II)-2-(2-(2-methoxyethoxy)ethoxy)acetate (0.20 g, 0.48 mmol) in toluene (20 ml) gave 1.29 g (63 wt.%) of a pale violet powder.

*Hybrid material 4a:* Polymerization of 2,2'-spirobi[4*H*-1,3,2-benzodioxasiline] (1.27 g, 4.65 mmol) and **1** (0.7 g, 1.55 mmol) in the presence of iron(III) undecanate (0.28 g, 0.46 mmol) in toluene (25 ml) gave 1.76 g (78 wt.%) of a dark red powder.

*Hybrid material 4b:* Polymerization of 2,2'-spirobi[4*H*-1,3,2-benzodioxasiline] (1.20 g, 4.39 mmol) and **1** (0.66 g, 1.46 mmol) in the presence of iron(III) undecanate (0.30 g, 0.73 mmol) in toluene (25 ml) gave 1.36 g (63 wt.%) of a dark red powder.

*Hybrid material 5a:* Polymerization of 2,2'-spirobi[4*H*-1,3,2-benzodioxasiline] (1.64 g, 6.03 mmol) and **1** (0.91 g, 2.01 mmol) in the presence of nickel(II)-2-(2-(2-methoxyethoxy)ethoxy)acetate (0.62 g, 1.51 mmol) in toluene (25 ml) gave 2.16 g (68 wt.%) of a pale green powder.

*Hybrid material 5b:* Polymerization of 2,2'-spirobi[4*H*-1,3,2-benzodioxasiline] (0.72 g, 2.65 mmol) and **1** (1.20 g, 2.65 mmol) in the presence of nickel(II)-2-(2-(2-methoxyethoxy)ethoxy)acetate (0.33 g, 0.79 mmol) in toluene (20 ml) gave 1.06 g (47 wt.%) of a pale green powder.

#### *Hybrid material 6:*

A mixture of 2,2'-spirobi[4*H*-1,3,2-benzodioxasiline] (1.80 g, 6.61 mmol), **1** (1.0 g, 2.20 mmol) and copper(II) undecanate (1.15 g, 2.64 mmol) was dissolved in toluene (25 ml) at 90 °C. To the dark-red solution 0.08 ml (0.66 mmol) SnCl<sub>4</sub> was added. After stirring for 12 hours at 105 °C the as obtained precipitate was filtered off, washed three times with acetone (10 ml) and dried in vacuo to give 2.85 g (72 wt.%) of a pale brown powder.

#### *Production of the test cell*

For the electroactive material 87 wt.% of the nanocomposite **5a-r** was mixed with 6 wt.% of conductive black (Super P Li from Timcal) and 7 wt.% binder (polyvinylidene fluoride KYNAR FLEX® 2801) in 125 wt.% N-ethyl-2-pyrrolidone and stirred for 16 h. The coating material was subsequently applied to a copper film of thickness 20 µm (purity 99.9%) using a coating bar and dried at 120 °C under reduced pressure. For the building of the electrochemical test cells (2-electrode test arrangement analogous to a button cell), circular pieces with a diameter of 20 mm were punched out. Lithium foil was used as the counter and reference electrode. A 1 M solution of LiPF<sub>6</sub> in a 1:1 w/w mixture of ethylene carbonate and ethyl methyl carbonate was used as the electrolyte. For electrochemical characterization, the cells were connected to a Maccor Series 4000 battery cycling unit and were cycled at a specific current of 30 mA per gram of electroactive material between 10 mV and 2 V against Li/Li<sup>+</sup>. After 10 mV had been attained, the voltage was kept constant for 30 min. (according to US 20130341559 A1)
